# Supplementary material
Source: PubMed Central journal article supplement (PMC3982700)
Supplement: 1bf6a97823736003e19d61f0ff4c6aa8_genetics.113.159426-10.pdf [file 1bf6a97823736003e19d61f0ff4c6aa8_genetics.113.159426-10.pdf]

**Table S6** Genes showing evidence of allelic imbalance in “hybrid” SAM/ORE flies (i.e., in which one of the two alleles is transcribed at significantly higher levels). (See SuppTable6.csv in Dryad package, doi:10.5061/dryad.1375s)
