# Supplementary material
Source: PubMed Central journal article supplement (PMC3982700)
Supplement: 05a35d229da5e03b992d1f1f036faef3_genetics.113.159426-14.pdf [file 05a35d229da5e03b992d1f1f036faef3_genetics.113.159426-14.pdf]

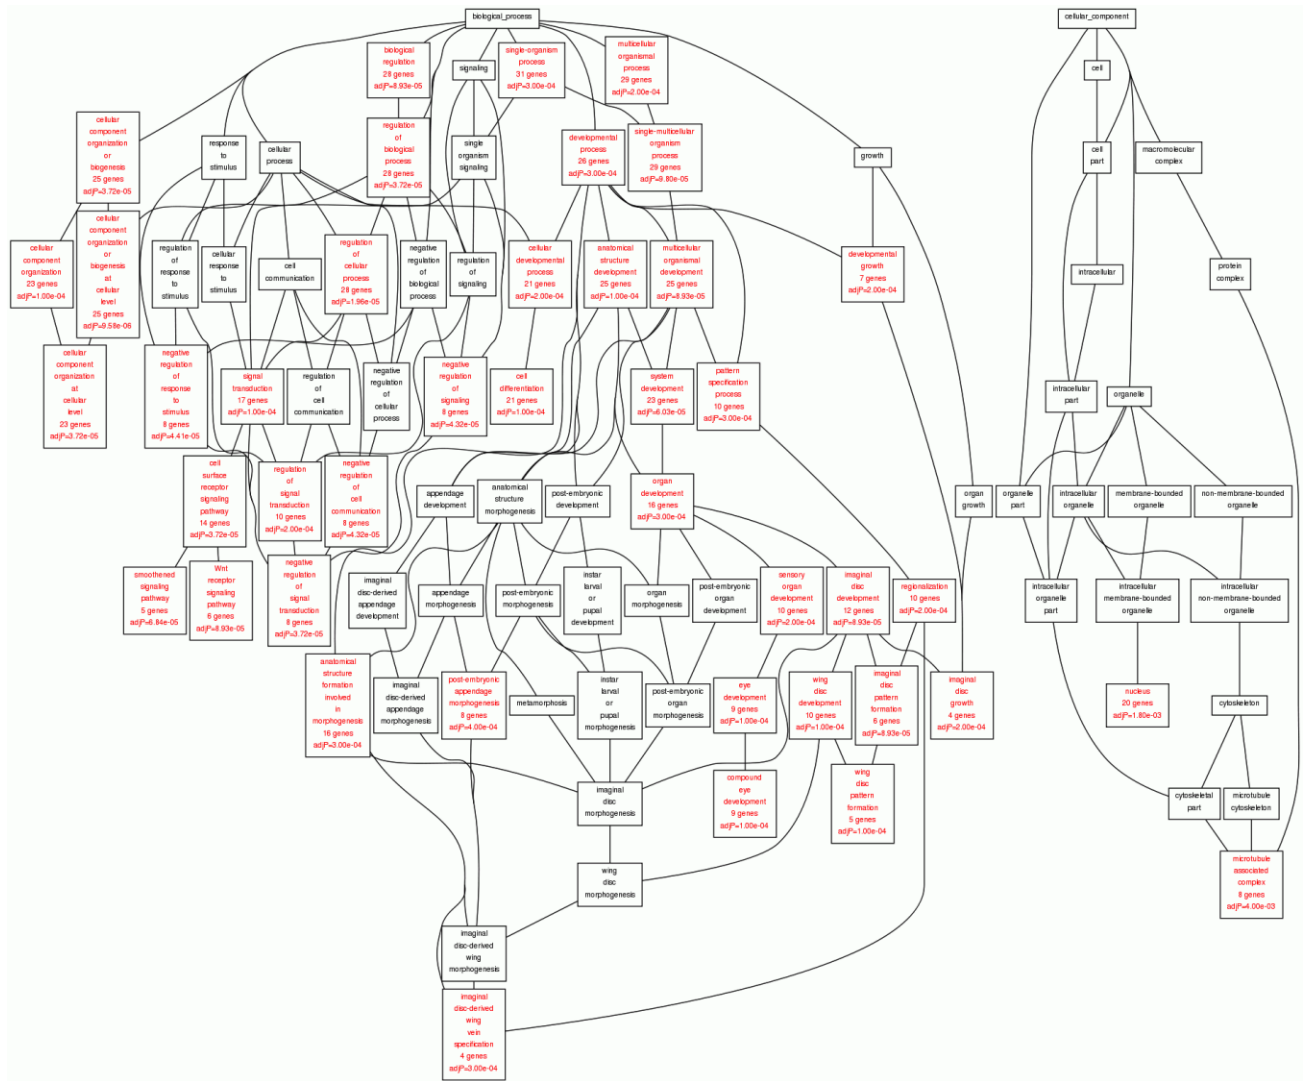

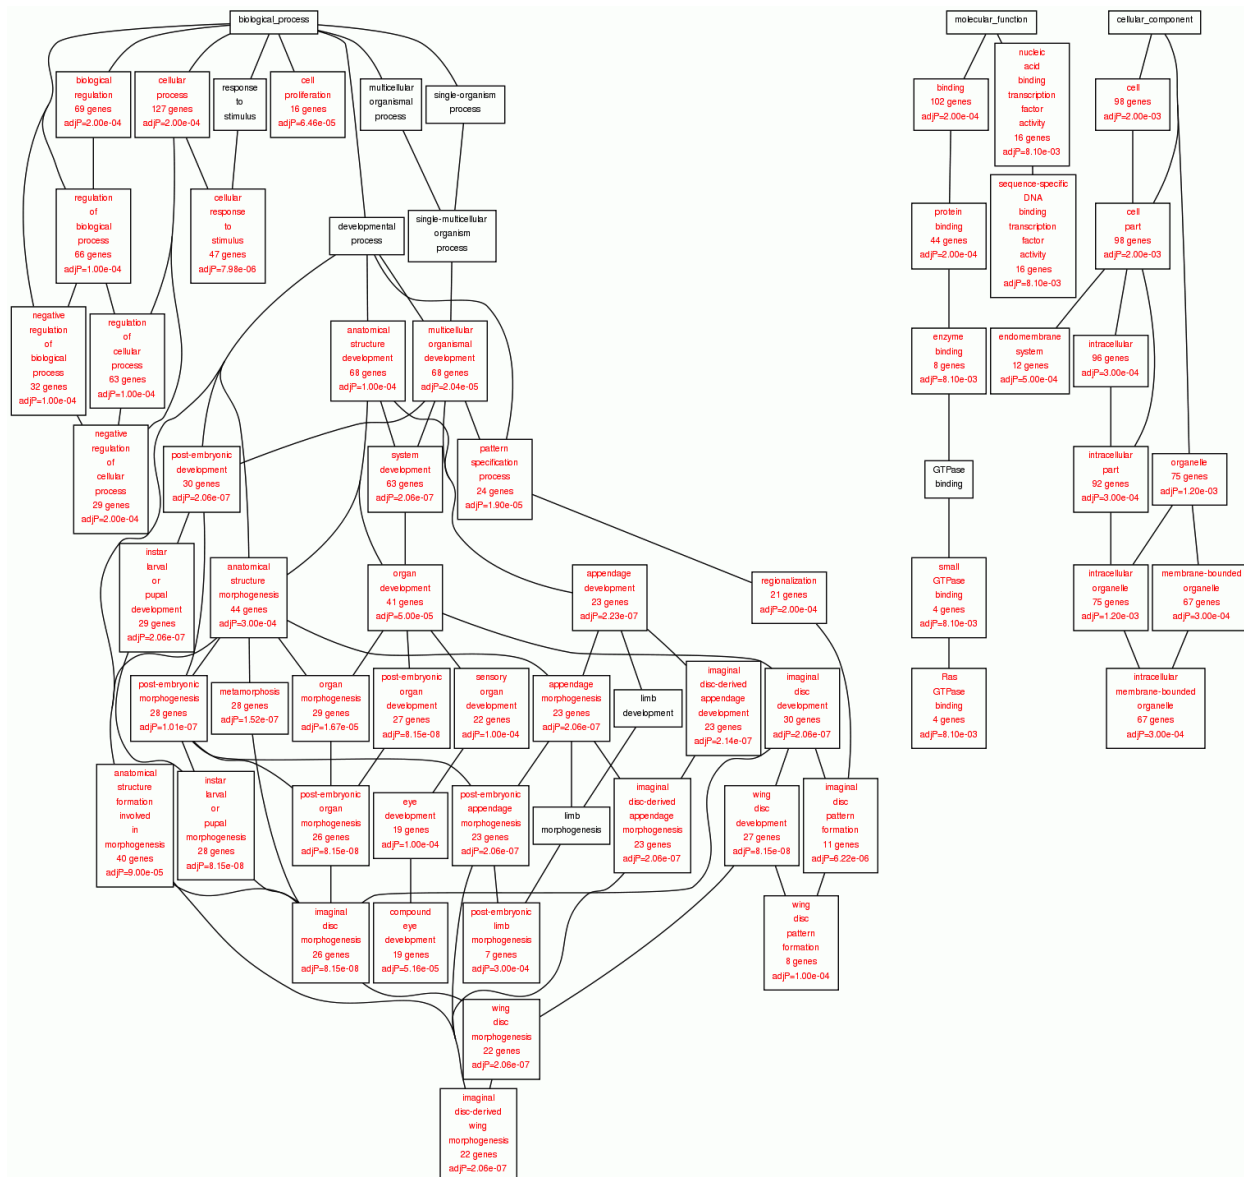

**Figure S6** Top scoring GO hits for candidate genes identified by integrated analysis using (A) significant *sd* genotype effects for expression datasets and (B) significant genotype-by-background interaction effects for expression datasets.
