# Supplementary material
Source: PubMed Central journal article supplement (PMC3982700)
Supplement: 30c0fb38e6d7b8c1460667e142c1e648_genetics.113.159426-9.pdf [file 30c0fb38e6d7b8c1460667e142c1e648_genetics.113.159426-9.pdf]

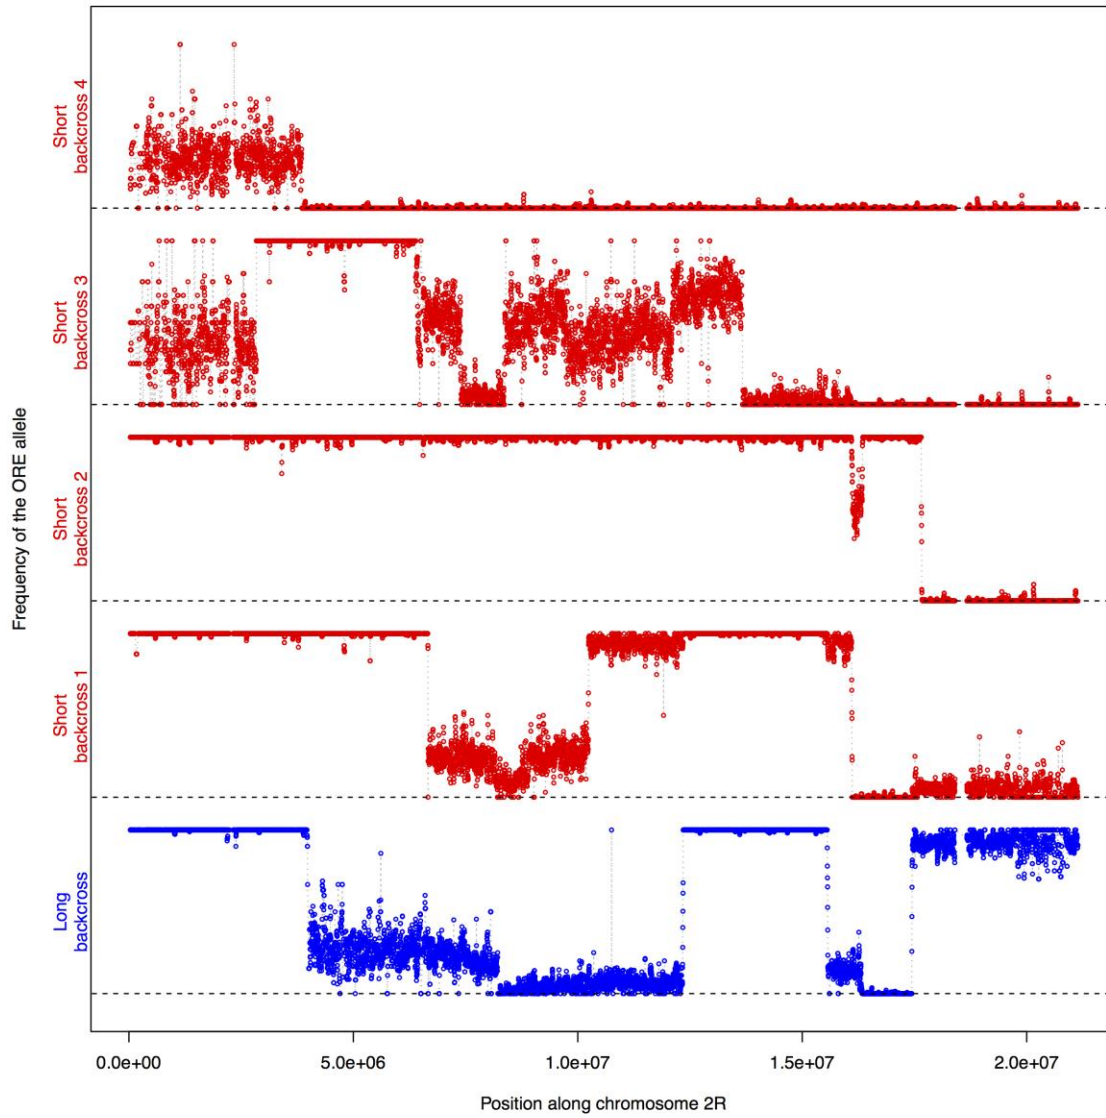

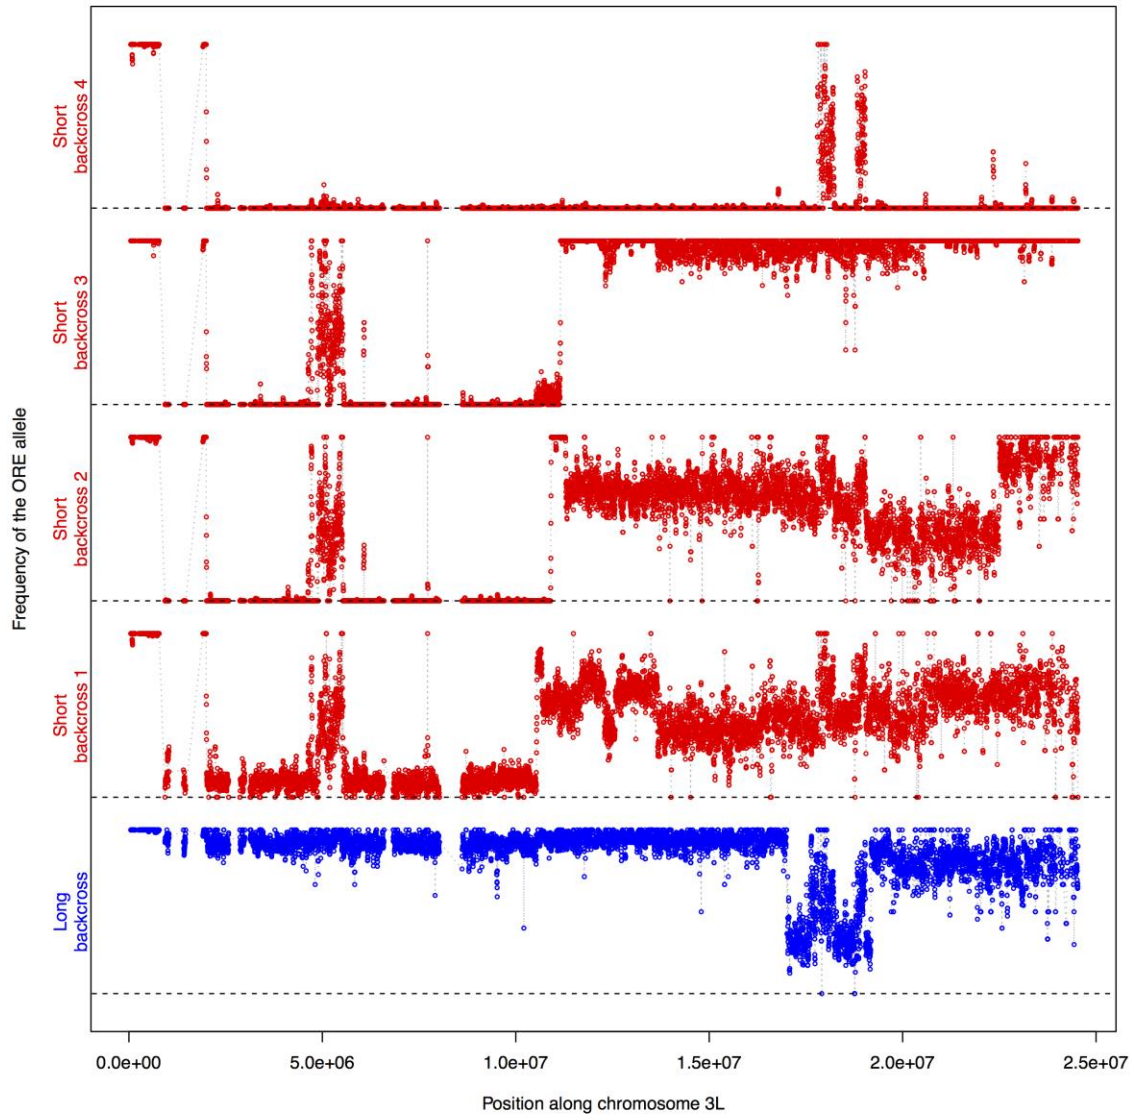

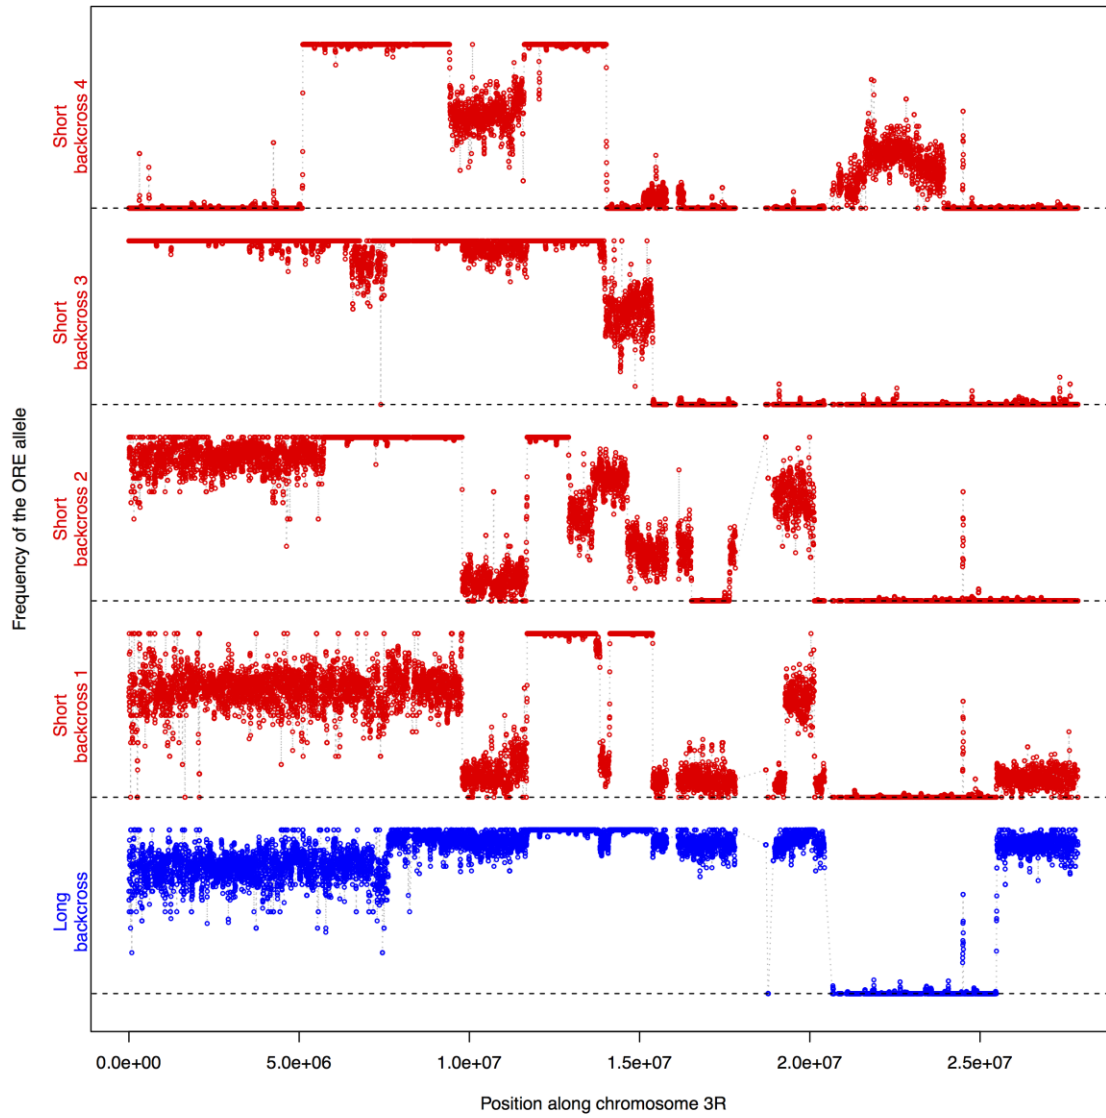

**Figure S1** Frequency of the ORE allele along the length of chromosome arms 2R, 3L, and 3R in short- and long-wing  $sd^{E3}$  backcross lines.
