# Supplementary material
Source: PubMed Central journal article supplement (PMC3982700)
Supplement: 058b0ad8f4e39f2510739d9bbb8f763a_genetics.113.159426-1.pdf [file 058b0ad8f4e39f2510739d9bbb8f763a_genetics.113.159426-1.pdf]

**Table S1 Known SD binding site sequences used to generate position weight matrix to scan the SAM and ORE genomes for predicted SD binding sites.**

| Gene  | Coordinates           | Sequence                                 | Source          |
|-------|-----------------------|------------------------------------------|-----------------|
| ct    | X:7424390..7424403    | TTTGTGAATGAAGT                           | REDfly TF000140 |
| ct    | X:7424422..7424433    | TAACATTTAATT                             | REDfly TF000139 |
| ct    | X:7424473..7424487    | GATAAACAGCAGTGT                          | REDfly TF000138 |
| ct    | X:7424494..7424520    | GCTGTTTTTTTAAATGAATTTCTCTA               | REDfly TF000137 |
| ct    | X:7424594..7424610    | AAAATTATTGAAATTAC                        | REDfly TF000136 |
| ct    | X:7424692..7424701    | GGAATGGGAT                               | REDfly TF000135 |
| ct    | X:7424821..7424843    | AATGTAATTCGAAAAATGTCGTC                  | REDfly TF000134 |
| vg    | 2R:8782964..8783003   | GCTAGTTGGAATGTGCTATGAAATGTCGCCGGAATGCGAT | REDfly TF001715 |
| vg    | 2R:8783977..8783987   | GGAAATATCTT                              | REDfly TF000458 |
| vg    | 2R:8784014..8784027   | TGGGAATCCACGG                            | REDfly TF000459 |
| vg    | 2R:8784101..8784114   | CACGCGGCATGGCA                           | REDfly TF000460 |
| vg    | 2R:8784375..8784386   | GTTTGGGAATGTT                            | REDfly TF000465 |
| bs    | 2R:20229832..20229857 | TAAGAAATTCCTGGCATAGTTAAGT                | REDfly TF000512 |
| salm  | 2L:11454576..11454582 | TATGCGA                                  | REDfly TF000032 |
| salm  | 2L:11454656..11454679 | AATGGACATTCGTGGGATTCCAGA                 | REDfly TF001599 |
| salm  | 2L:11454657..11454680 | ATGGACATTCGTGGGATTCCAGAA                 | REDfly TF000029 |
| salm  | 2L:11454657..11454680 | ATGGACATTCGTGGGATTCCAGAA                 | REDfly TF000030 |
| kni   | 3L:20700051..20700068 | TACATTTGTCGCATAGTT                       | REDfly TF000811 |
| kni   | 3L:20700243..20700251 | ATACATACA                                | REDfly TF000812 |
| kni   | 3L:20700303..20700311 | AAAATGTCG                                | REDfly TF000813 |
| kni   | 3L:20700350..20700358 | GAAATGCGT                                | REDfly TF000814 |
| kni   | 3L:20700420..20700428 | AGAAATAGT                                | REDfly TF000815 |
| diap1 |                       | GCATTCCATT                               | Wu et al. 2008  |
