# Supplementary material
Source: PubMed Central journal article supplement (PMC3982700)
Supplement: 347da46c967c933eabe9a864c844d34b_genetics.113.159426-3.pdf [file 347da46c967c933eabe9a864c844d34b_genetics.113.159426-3.pdf]

**Table S2** Position weight matrix used to scan the SAM and ORE genomes for SD binding sites, derived from a MEME (Bailey et al. 2009) scan of 23 known SD binding sites.

|   | A  | C | G  | T  |
|---|----|---|----|----|
| 1 | 0  | 5 | 14 | 4  |
| 2 | 8  | 1 | 14 | 0  |
| 3 | 18 | 4 | 0  | 1  |
| 4 | 22 | 0 | 1  | 0  |
| 5 | 0  | 0 | 0  | 23 |
| 6 | 3  | 0 | 14 | 6  |
| 7 | 3  | 3 | 3  | 14 |
