# Supplementary material
Source: PubMed Central journal article supplement (PMC3982700)
Supplement: 399e0ac714f237a95cf33c68e84cae47_genetics.113.159426-4.pdf [file 399e0ac714f237a95cf33c68e84cae47_genetics.113.159426-4.pdf]

**Table S4 Detailed sequence pile-up (Li et al. 2009) for *scalloped* binding site regulating *sal* (Guss et al. 2001).**

| Chrom. | Pos.     | Ref. | # reads (SAM) | Read bases (SAM) | Base quality (SAM)   | # reads (ORE) | Read bases (ORE)  | Base quality (ORE) |
|--------|----------|------|---------------|------------------|----------------------|---------------|-------------------|--------------------|
| 2L     | 11454659 | G    | 17            | ,,.....,         | II+IIIIIGIIIIHII     | 17            | ,,.....,          | 77977<97777787777  |
| 2L     | 11454660 | G    | 18            | ,,.....,^],      | II3IIIIIGIIIIIEIIE   | 17            | ,,.....,          | 34644964444454444  |
| 2L     | 11454661 | A    | 18            | ,,.....,         | IH6@HIHIBIIIIIIHH    | 17            | ggGGggGgGggGGgggg | )644964444454444   |
| 2L     | 11454662 | C    | 18            | ,\$,.....,       | EI8IIIIIBHIIIIIII    | 18            | ,\$,.....,^>],    | )HFF?IIIIIIIIIC    |
| 2L     | 11454663 | A    | 17            | ,,.....,         | I38IIIIIGGHIIIIHII   | 17            | ,\$,.....,        | )HFFDIHIIIIIIH8    |
| 2L     | 11454664 | T    | 17            | ,,.....,         | IBGIIIIIGIIIIHHIII   | 16            | ,\$,\$,\$,.....,  | >>>DIGIIIIHIGIIC   |
| 2L     | 11454665 | T    | 18            | ,,.....,^],      | IAEIIIIIGIIIIIIHIE   | 13            | ,\$,.....,        | BIIIIIIIIII?       |
| 2L     | 11454666 | C    | 18            | ,\$,.....,       | EAEIIIIIGIHHIIGIIIIH | 12            | ,,.....,          | 5GIIIIIIHI@        |
| 2L     | 11454667 | G    | 17            | ,,.....,         | A@IIIIIGIIIIIGIIII   | 13            | ,,.....,^],       | -8888988888?!      |
| 2L     | 11454668 | T    | 17            | ,\$,\$,.....,    | ?BIIIIIDIIII@IFI     | 13            | CcCccCCcccccc     | !44445444442!      |
| 2L     | 11454669 | G    | 15            | ,,.....,         | IIIGIIIIIGIHI        | 13            | ,,.....,          | I3333433333<!      |
| 2L     | 11454670 | G    | 15            | ,,.....,         | IIIBIIIIHGIIII       | 13            | A\$aAaaAAaaaaaa   | !1111211111;!      |
| 2L     | 11454671 | G    | 15            | ,,.....,         | IIIEIIIIIGIIII       | 13            | ,,.....,^>.       | 7777877777@0E      |
| 2L     | 11454672 | A    | 15            | ,,.....,         | IIIGIIIIIDIIIIH      | 14            | ,,.....,^],       | IGIIIIII46HE       |
| 2L     | 11454673 | T    | 16            | ,\$,\$,.....,^], | >>IIGHIIIIIGIIIFB    | 15            | ,,.....,^],       | GIIIIIIHII;>HIB    |
| 2L     | 11454674 | T    | 14            | ,,.....,         | IIGIIIIHGIIHIE       | 15            | ,,.....,          | HIIIIIEII,<HIE     |
| 2L     | 11454675 | C    | 14            | ,\$,.....,       | >E@IIIIIGIIIFG       | 15            | ,,.....,a,...     | EIIIIIIII,IGII     |
| 2L     | 11454676 | C    | 13            | ,\$,.....,       | BGIIIIIIIIII         | 15            | ,\$,.....,        | BIIIIIGII;IHII     |
