# Supplementary material
Source: PubMed Central journal article supplement (PMC3982700)
Supplement: ad0b11399ae87470806dace1164fd40a_genetics.113.159426-5.pdf [file ad0b11399ae87470806dace1164fd40a_genetics.113.159426-5.pdf]

**Table S1** Known SD binding site sequences used to generate position weight matrix to scan the SAM and ORE genomes for predicted SD binding sites.

| Gene  | Coordinates           | Sequence                                 | Source          |
|-------|-----------------------|------------------------------------------|-----------------|
| ct    | X:7424390..7424403    | TTTGTGAATGAAGT                           | REDfly TF000140 |
| ct    | X:7424422..7424433    | TAACATTTAATT                             | REDfly TF000139 |
| ct    | X:7424473..7424487    | GATAAACAGCAGTGT                          | REDfly TF000138 |
| ct    | X:7424494..7424520    | GCTGTTTTTTTAAATGAATTTCTCTA               | REDfly TF000137 |
| ct    | X:7424594..7424610    | AAAATTATTGAAATTAC                        | REDfly TF000136 |
| ct    | X:7424692..7424701    | GGAATGGGAT                               | REDfly TF000135 |
| ct    | X:7424821..7424843    | AATGTAATTCGAAAAATGTCGTC                  | REDfly TF000134 |
| vg    | 2R:8782964..8783003   | GCTAGTTGGAATGTGCTATGAAATGTCGCCGGAATGCGAT | REDfly TF001715 |
| vg    | 2R:8783977..8783987   | GGAAATATCTT                              | REDfly TF000458 |
| vg    | 2R:8784014..8784027   | TGGGAATCCACGG                            | REDfly TF000459 |
| vg    | 2R:8784101..8784114   | CACGCGGCATGGCA                           | REDfly TF000460 |
| vg    | 2R:8784375..8784386   | GTTTGGGAATGTT                            | REDfly TF000465 |
| bs    | 2R:20229832..20229857 | TAAGAAATTCCTGGCATAGTTAAGT                | REDfly TF000512 |
| salm  | 2L:11454576..11454582 | TATGCGA                                  | REDfly TF000032 |
| salm  | 2L:11454656..11454679 | AATGGACATTCGTGGGATTCCAGA                 | REDfly TF001599 |
| salm  | 2L:11454657..11454680 | ATGGACATTCGTGGGATTCCAGAA                 | REDfly TF000029 |
| salm  | 2L:11454657..11454680 | ATGGACATTCGTGGGATTCCAGAA                 | REDfly TF000030 |
| kni   | 3L:20700051..20700068 | TACATTTGTCGCATAGTT                       | REDfly TF000811 |
| kni   | 3L:20700243..20700251 | ATACATACA                                | REDfly TF000812 |
| kni   | 3L:20700303..20700311 | AAAATGTCG                                | REDfly TF000813 |
| kni   | 3L:20700350..20700358 | GAAATGCGT                                | REDfly TF000814 |
| kni   | 3L:20700420..20700428 | AGAAATAGT                                | REDfly TF000815 |
| diap1 |                       | GCATTCCATT                               | Wu et al. 2008  |

**Table S2** Position weight matrix used to scan the SAM and ORE genomes for SD binding sites, derived from a MEME (Bailey et al. 2009) scan of 23 known SD binding sites.

|   | A  | C | G  | T  |
|---|----|---|----|----|
| 1 | 0  | 5 | 14 | 4  |
| 2 | 8  | 1 | 14 | 0  |
| 3 | 18 | 4 | 0  | 1  |
| 4 | 22 | 0 | 1  | 0  |
| 5 | 0  | 0 | 0  | 23 |
| 6 | 3  | 0 | 14 | 6  |
| 7 | 3  | 3 | 3  | 14 |

**Table S3 Detailed sequence pile-up (Li et al. 2009) for *scalloped* binding site regulating *cut* (Halder & Carrol 2001, Guss et al. 2001).**

| Chrom. | Pos.    | Ref. | # reads (SAM) | Read bases (SAM) | Base quality (SAM) | # reads (ORE) | Read bases (ORE) | Base quality (ORE)        |
|--------|---------|------|---------------|------------------|--------------------|---------------|------------------|---------------------------|
| X      | 7424817 | T    | 15            | .....            | HFIHIDIBI<GIIII    | 15            | .\$.....         | DIIFIIIIIIHII             |
| X      | 7424818 | G    | 15            | .....            | HIHGIEIGIGGIIIG    | 15            | .....^]          | GIIIIHGIIIIHIE            |
| X      | 7424819 | T    | 16            | ,\$.....^].      | EHGGICHGIGDIIHGE   | 15            | ,\$.....         | EIIIIIIIIII               |
| X      | 7424820 | C    | 15            | .....            | IIII4IBIBGIIIGI    | 16            | .....^],^].      | IGGIIIIIIIBIIEE           |
| X      | 7424821 | A    | 15            | .....G.          | IHIICIBIGGII*I     | 18            | .....^],^].      | IIIIIIIBIIIIIDBB          |
| X      | 7424822 | A    | 15            | .....            | FHHIEIGIDGIIGGI    | 18            | .....            | IIIIIIIIIIHIIIEE          |
| X      | 7424823 | T    | 15            | .....            | HIIDIGICGIIIGI     | 18            | .....            | IIIIIIHHI@IIIGII          |
| X      | 7424824 | G    | 15            | .....            | GIIIDI@IEGIGIGI    | 18            | .....            | IIIIIIIDIIIIHIIIG         |
| X      | 7424825 | T    | 15            | ,\$.....         | EGGG=HDCGIIIGI     | 18            | .....            | IIIIIIIIIGIIEHII          |
| X      | 7424826 | A    | 14            | .....            | IHIBIGIDGGIIGI     | 18            | .....            | IIIIIIIIIGIIII            |
| X      | 7424827 | A    | 14            | .....            | HII:I4IDGIIIGI     | 19            | .....^].         | IIIIIIIIIIHIG>            |
| X      | 7424828 | T    | 14            | .....            | III=IEIEGIIII      | 22            | .....^],^],^].   | IHIIIIIIIIIIHIEBBB        |
| X      | 7424829 | T    | 14            | .....            | III?IBICDIIII      | 23            | .....^].         | IIHIIIFIIHIIIFIHICEEED    |
| X      | 7424830 | C    | 14            | .....            | IIH?IDIDDIIII      | 23            | .....            | IIIIIIIIHIGIIHBFHF        |
| X      | 7424831 | G    | 14            | ,\$.....         | EDIDIGICGIIII      | 24            | .....^].         | IIIIIIIIIIIIIGBIHIE       |
| X      | 7424832 | A    | 14            | .....^].         | >>DFGI>EIIII7      | 25            | .....^].         | IIHIIIIIGIIIIHGHIGI>      |
| X      | 7424833 | A    | 14            | ,\$.....         | ;<IGIGHIIII:       | 25            | .....            | IIIIIIIIHIIIIIDI>II?      |
| X      | 7424834 | A    | 13            | ,\$.....         | 9?IBIGHIIII5       | 25            | .....            | IIIIIIIIIIIEIH>IIHIA      |
| X      | 7424835 | A    | 12            | .....            | BIGIDHIIII5        | 25            | .....            | IIIIIIIIIIIIIGIHHIB       |
| X      | 7424836 | A    | 12            | .....            | DIGIDHIIII2        | 25            | .....            | IIIGIIIIIIHIIIEIIGIHHIE   |
| X      | 7424837 | T    | 12            | .....            | @IBGBEFBIII-       | 26            | .....^].         | IIIIIIIIII8IHHHI@ADHDEDIE |
| X      | 7424838 | G    | 12            | .....            | GIGHDDIIII:        | 26            | .....            | HIIIIIIIIIIIIIGHHIIII     |
| X      | 7424839 | T    | 12            | .....            | GH@IGGHIFHI4       | 26            | .....            | HIIIIIIHIIIGIIII3IHHIHI   |
| X      | 7424840 | C    | 12            | .....            | GIGI<GIIII5        | 26            | .....            | IIIIIIIIIIHIG8IHDHII      |
| X      | 7424841 | G    | 13            | .....^].         | :IGIGGIIGII7E      | 26            | .....            | IIIIIIIIIIHIIIGIHHII      |



**Table S5** Top 200 genes identified as being differentially expressed between wild-type and *sd<sup>E3</sup>* mutant flies by DGE analysis. (See SuppTable5.csv in Dryad package, doi:10.5061/dryad.1375s)

**Table S6** Genes showing evidence of allelic imbalance in “hybrid” SAM/ORE flies (i.e., in which one of the two alleles is transcribed at significantly higher levels). (See SuppTable6.csv in Dryad package, doi:10.5061/dryad.1375s)

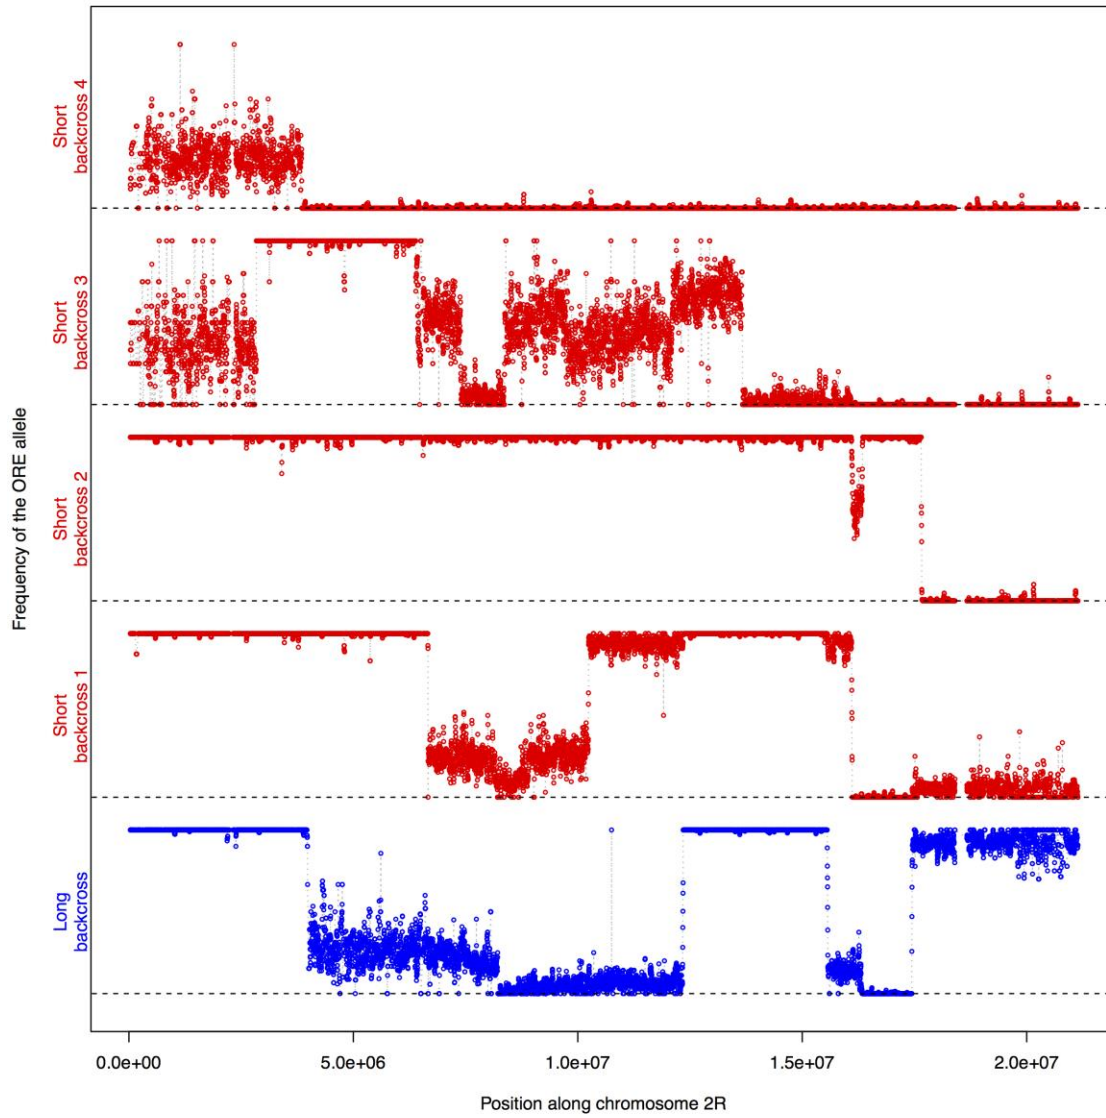

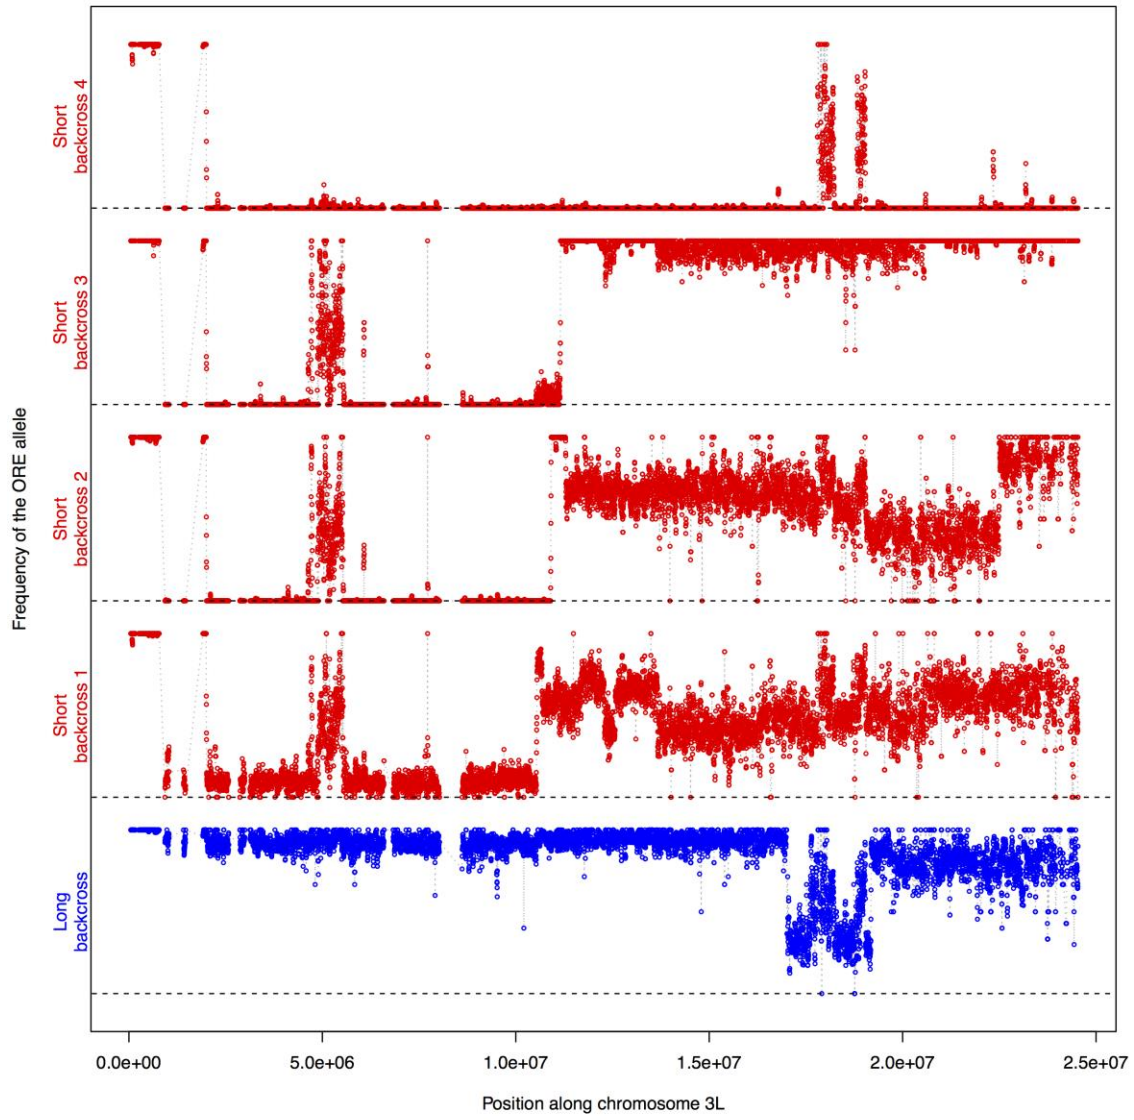



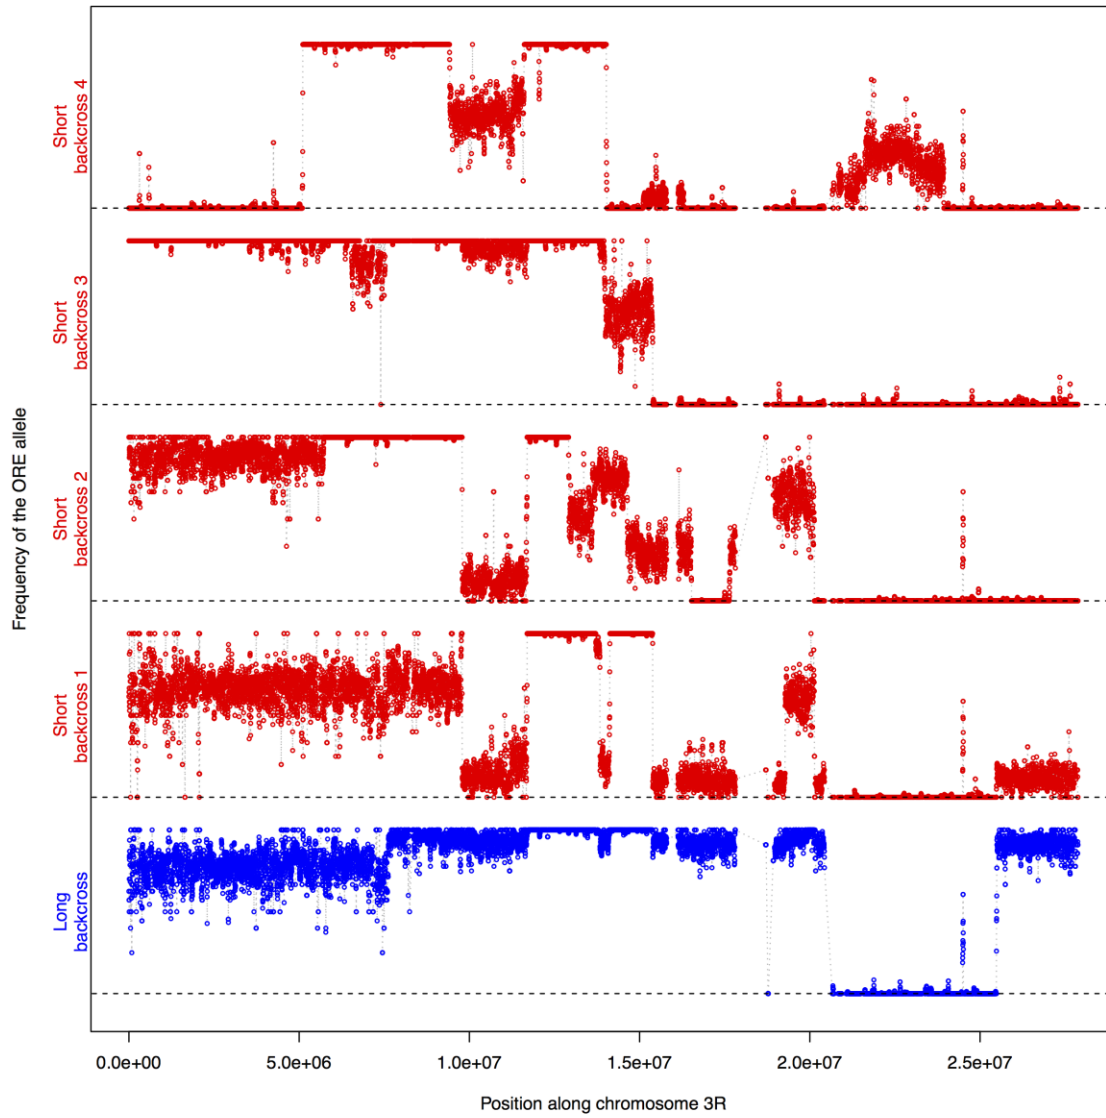

**Figure S1** Frequency of the ORE allele along the length of chromosome arms 2R, 3L, and 3R in short- and long-wing  $sd^{E3}$  backcross lines.



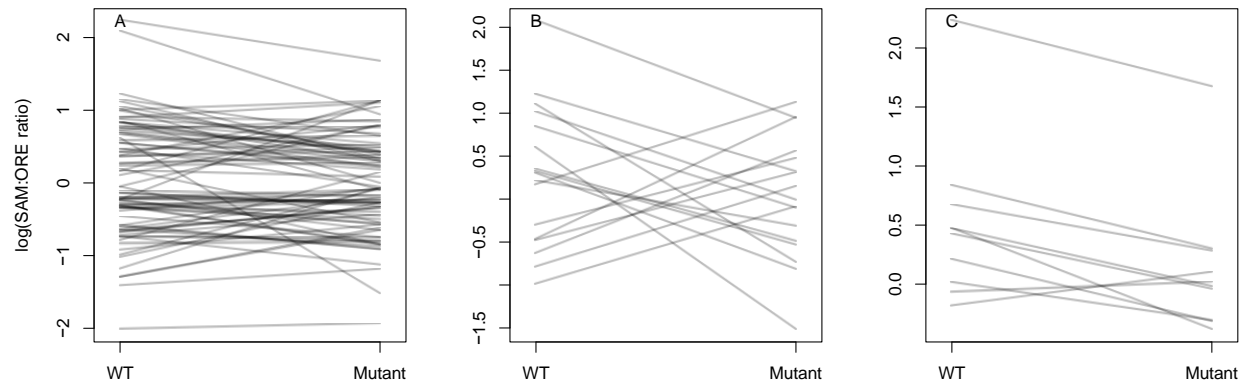

**Figure S3** Allelic imbalance in SAM/ORE “hybrid” flies with both wild-type and *sd<sup>E3</sup>* genotypes. Only sequence tags represented by at least five reads of each allele in all samples are represented in this plot. (A) Genes showing evidence of allelic imbalance ( $q < 0.05$ ). (B) Genes showing evidence of genotype-dependent allelic imbalance ( $q < 0.05$ ). (C) Genes near polymorphic predicted SD binding site ( $p < 0.05$ ).

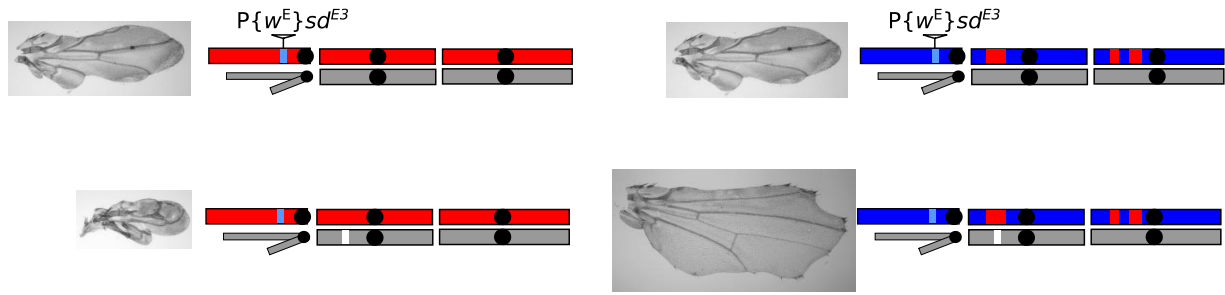

**Figure S4** Schematic illustrating tests to distinguish between second- and higher-order epistasis. Red indicates the ORE genetic background; blue indicates the SAM genetic background; grey indicates the genetic background of the deletion strain; white indicates a chromosomal deletion; and the light blue bar on the X chromosome indicates the  $sd^{E3}$  allele and the genetic background in which it was originally generated. The genotypes and phenotypes on the left illustrate that this particular deletion enhances the  $sd^{E3}$  phenotype in an ORE background, i.e., results in even smaller wings. On the right, however, this deletion suppresses the  $sd^{E3}$  phenotype in a short-wing introgression background (i.e., results in larger wings). However, because the short-wing and ORE flies both carry the same genetic background (ORE) opposite the deletion, this background dependence must be due to other loci elsewhere in the genome (in this case, illustrated by the SAM alleles elsewhere in the genome), indicating higher-order epistasis.

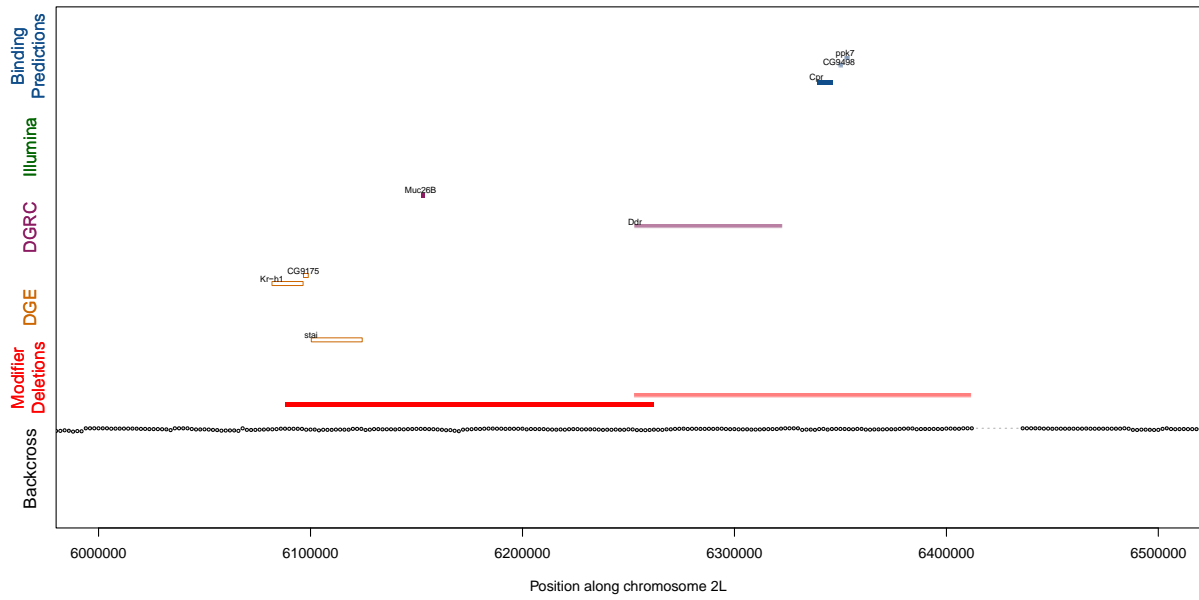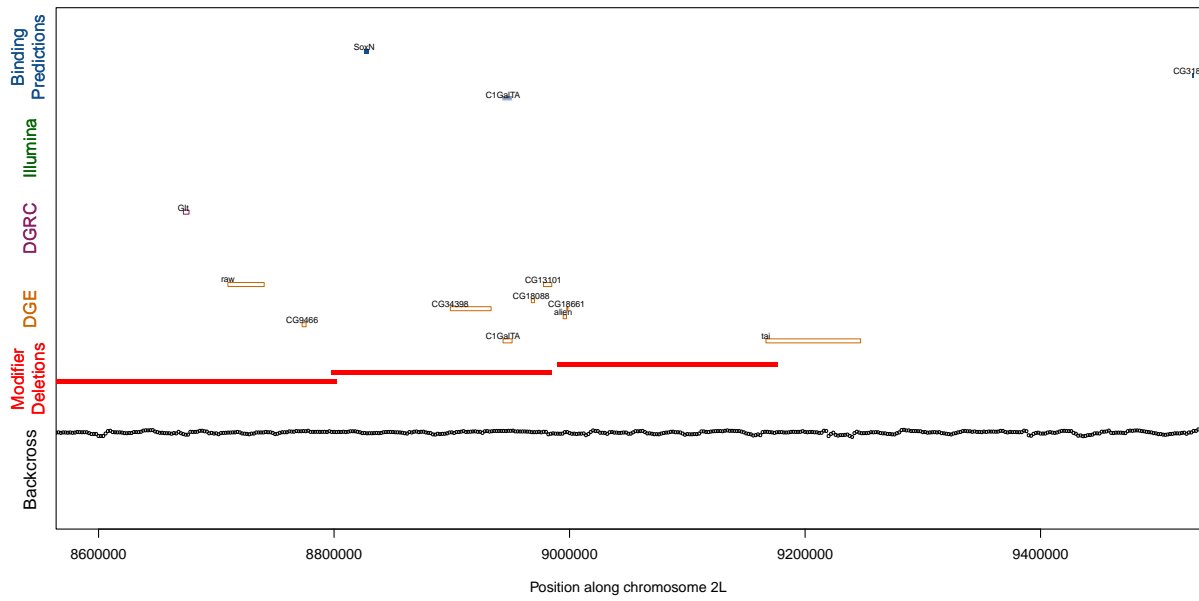

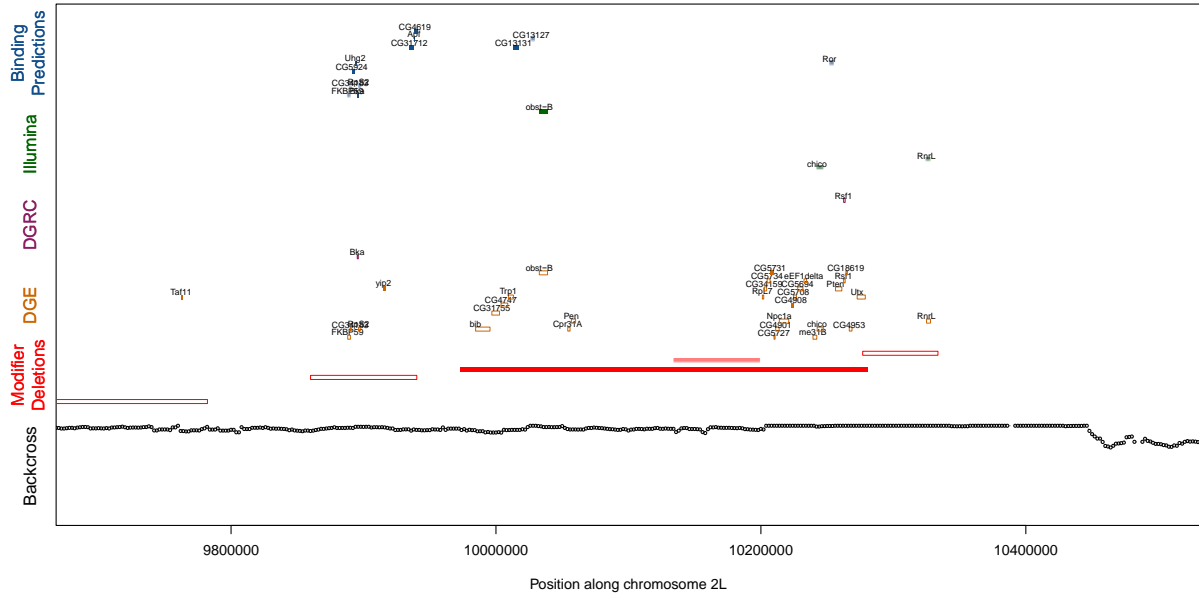

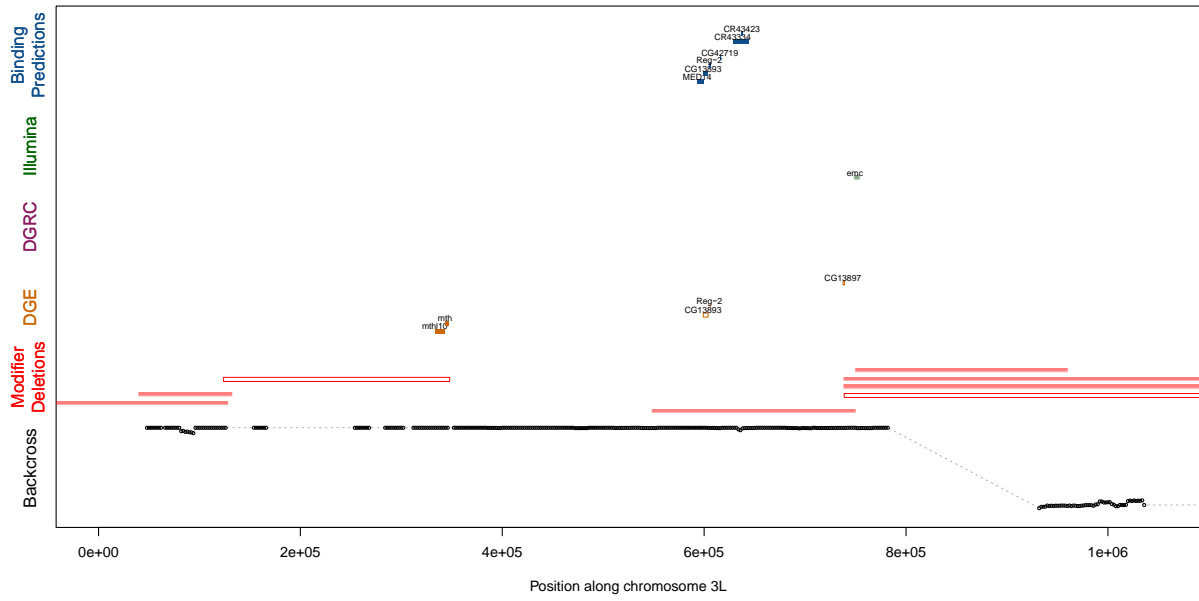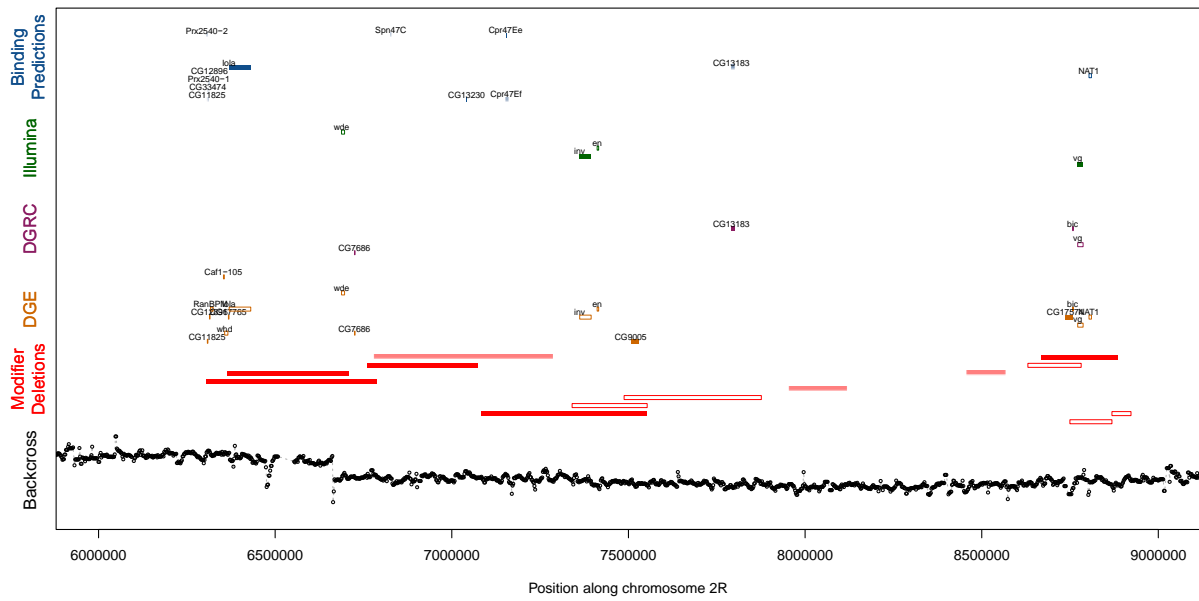

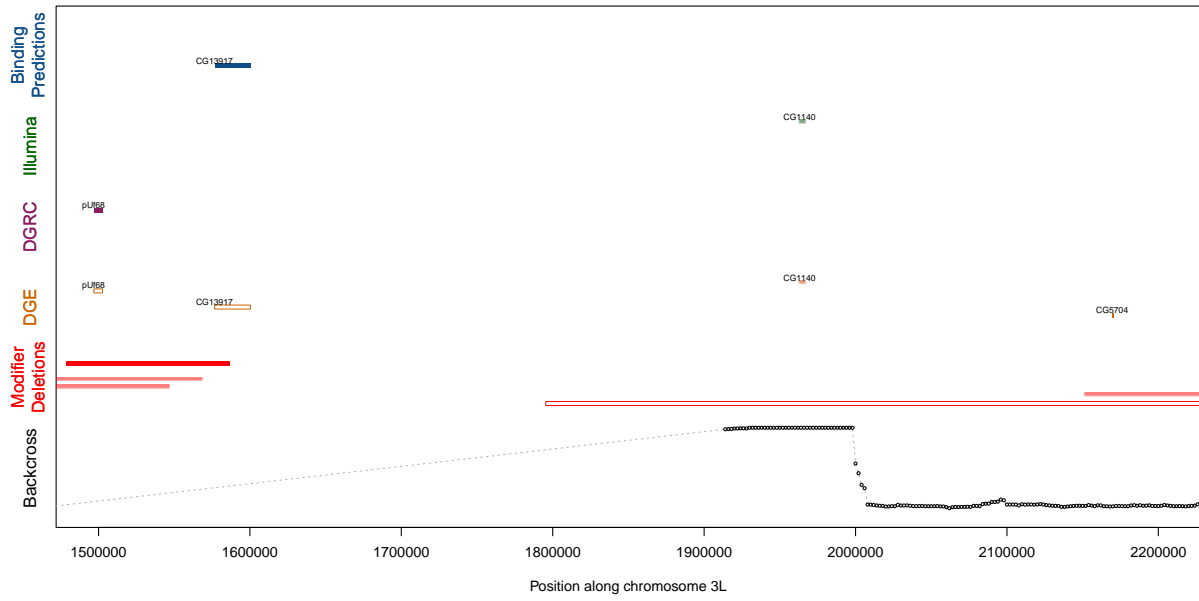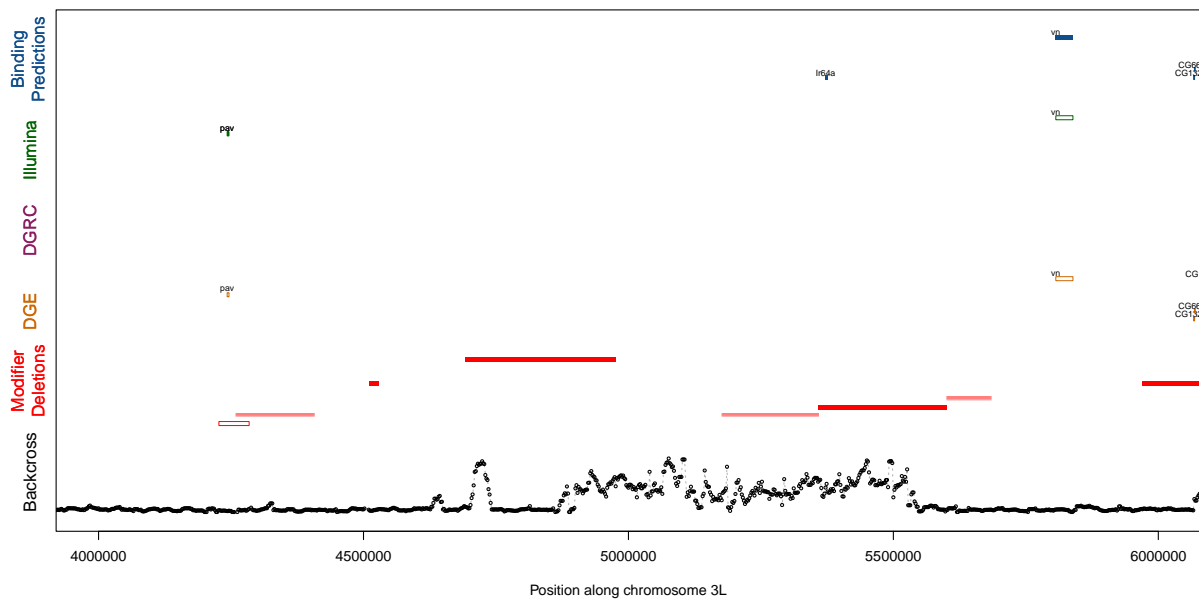





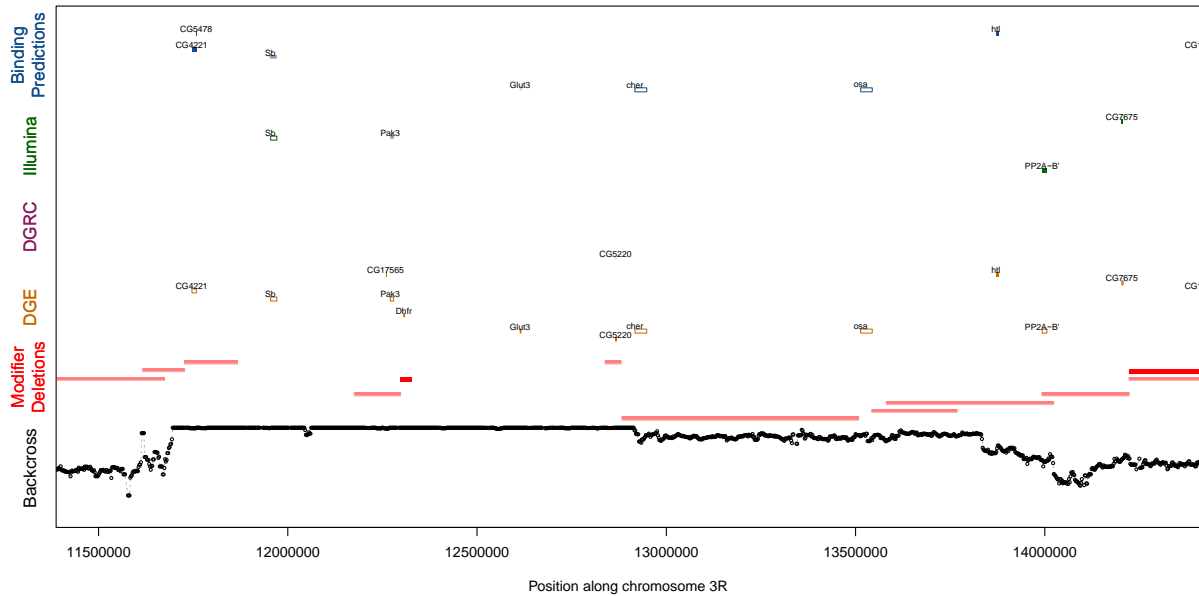

**Figure S5** Integrated plots showing results of independent genomic datasets used to investigate the genetic basis of background dependence of the  $sd^{E3}$  phenotype. Backcross: Average frequency of the ORE (short-wing) allele across four short-wing introgression lines. Modifier deletions: open bars represent deletions with a significant main effect on the  $sd^{E3}$  phenotype; light shaded bars represent deletions with a significant background-dependent effect on the  $sd^{E3}$  phenotype; and dark shaded bars represent deletions in which both the main and interaction effects are significant. DGE: open bars represent genes whose transcript counts are influenced by  $sd$  genotype; light shaded bars represent genes showing evidence of genotype-dependent allelic imbalance; and dark shaded bars represent genes showing evidence of both an overall effect of  $sd$  genotype and genotype-dependent allelic imbalance. DGRC and Illumina: open bars represent genes showing evidence of an effect of  $sd$  genotype on expression; light shaded bars represent genes showing evidence of a genotype-by-background interaction effect; and dark shaded bars represent genes showing evidence of both the main and interaction effects. Binding predictions: open bars represent genes predicted to be overall SD binding targets (in at least one of the two genetic backgrounds); light shaded bars represent genes predicted to show differential affinity for SD between the two backgrounds; and dark shaded bars represent genes showing evidence of both overall SD binding and differential affinity between backgrounds. Only genes showing evidence of at least four significant effects across all datasets are shown.

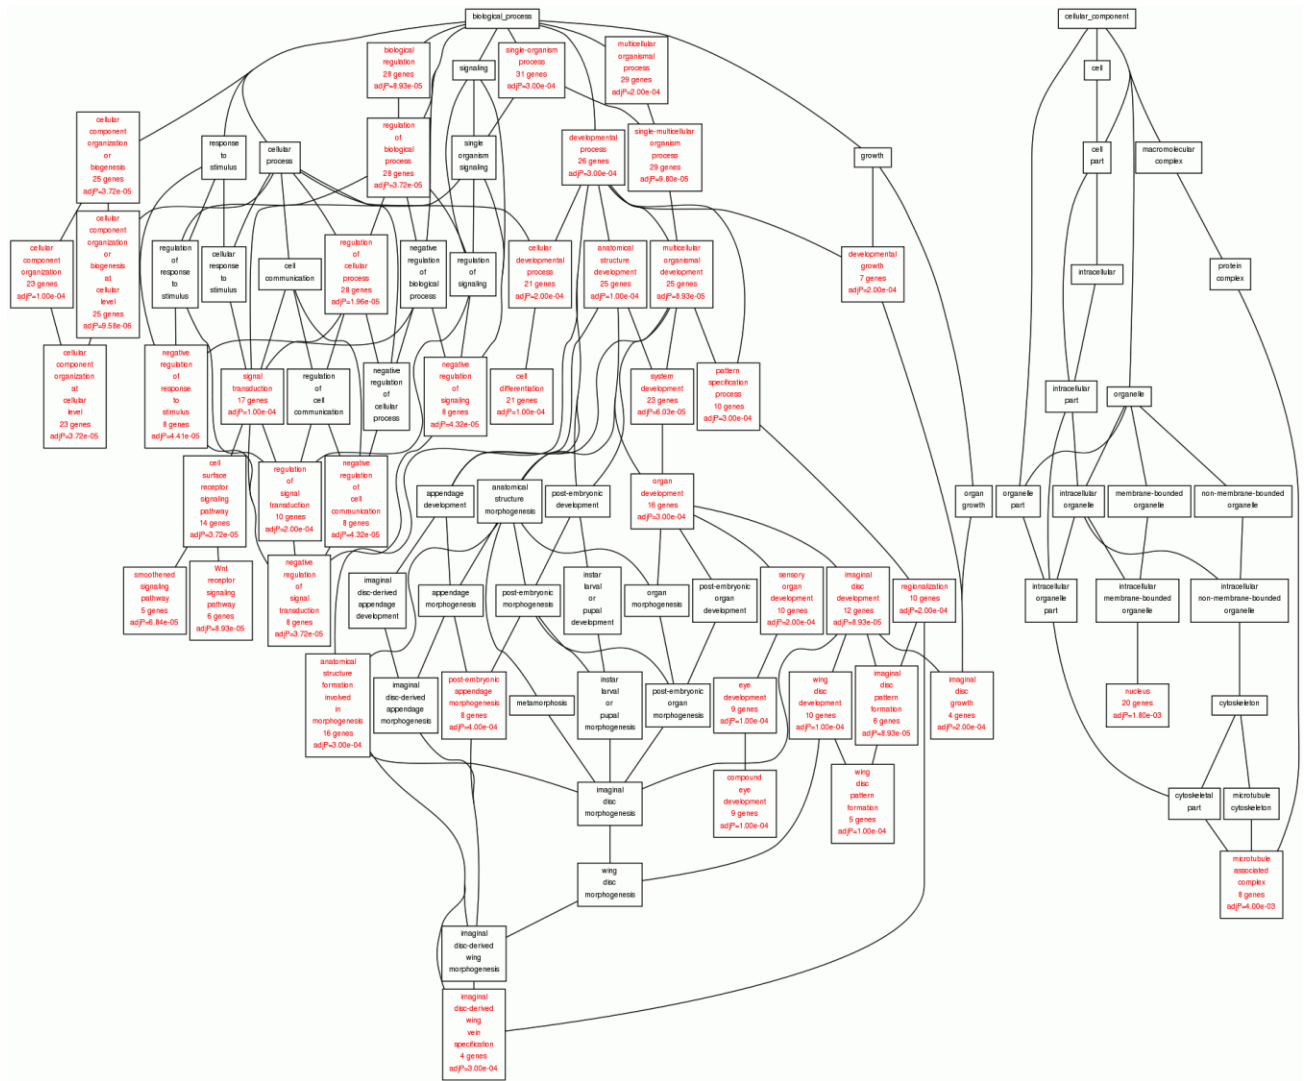

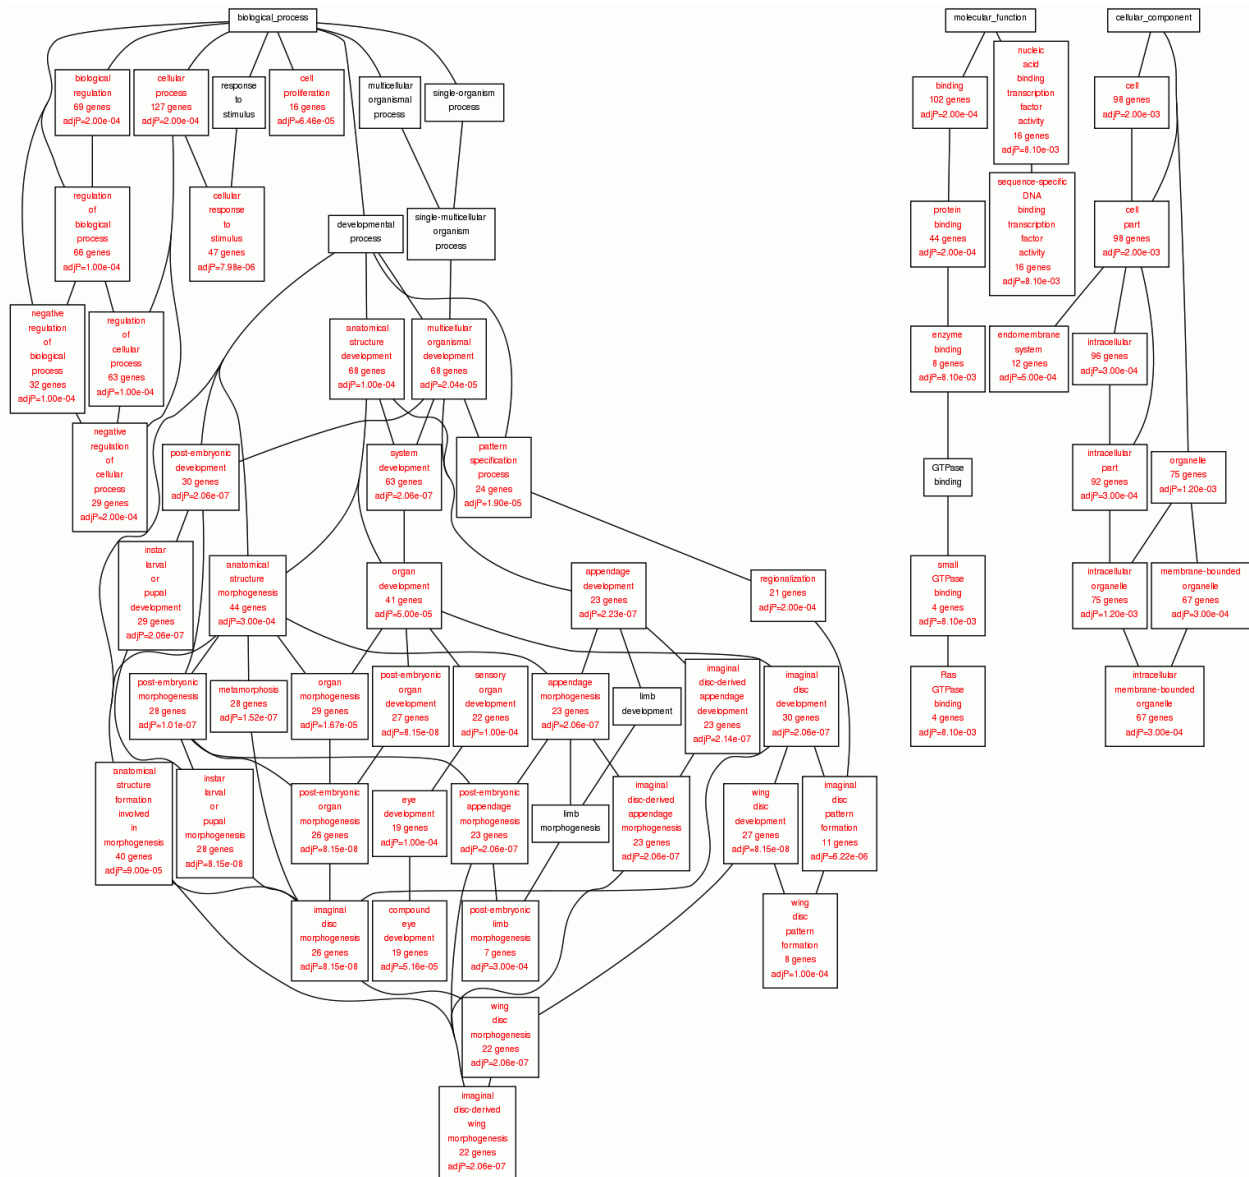

**Figure S6** Top scoring GO hits for candidate genes identified by integrated analysis using (A) significant *sd* genotype effects for expression datasets and (B) significant genotype-by-background interaction effects for expression datasets.

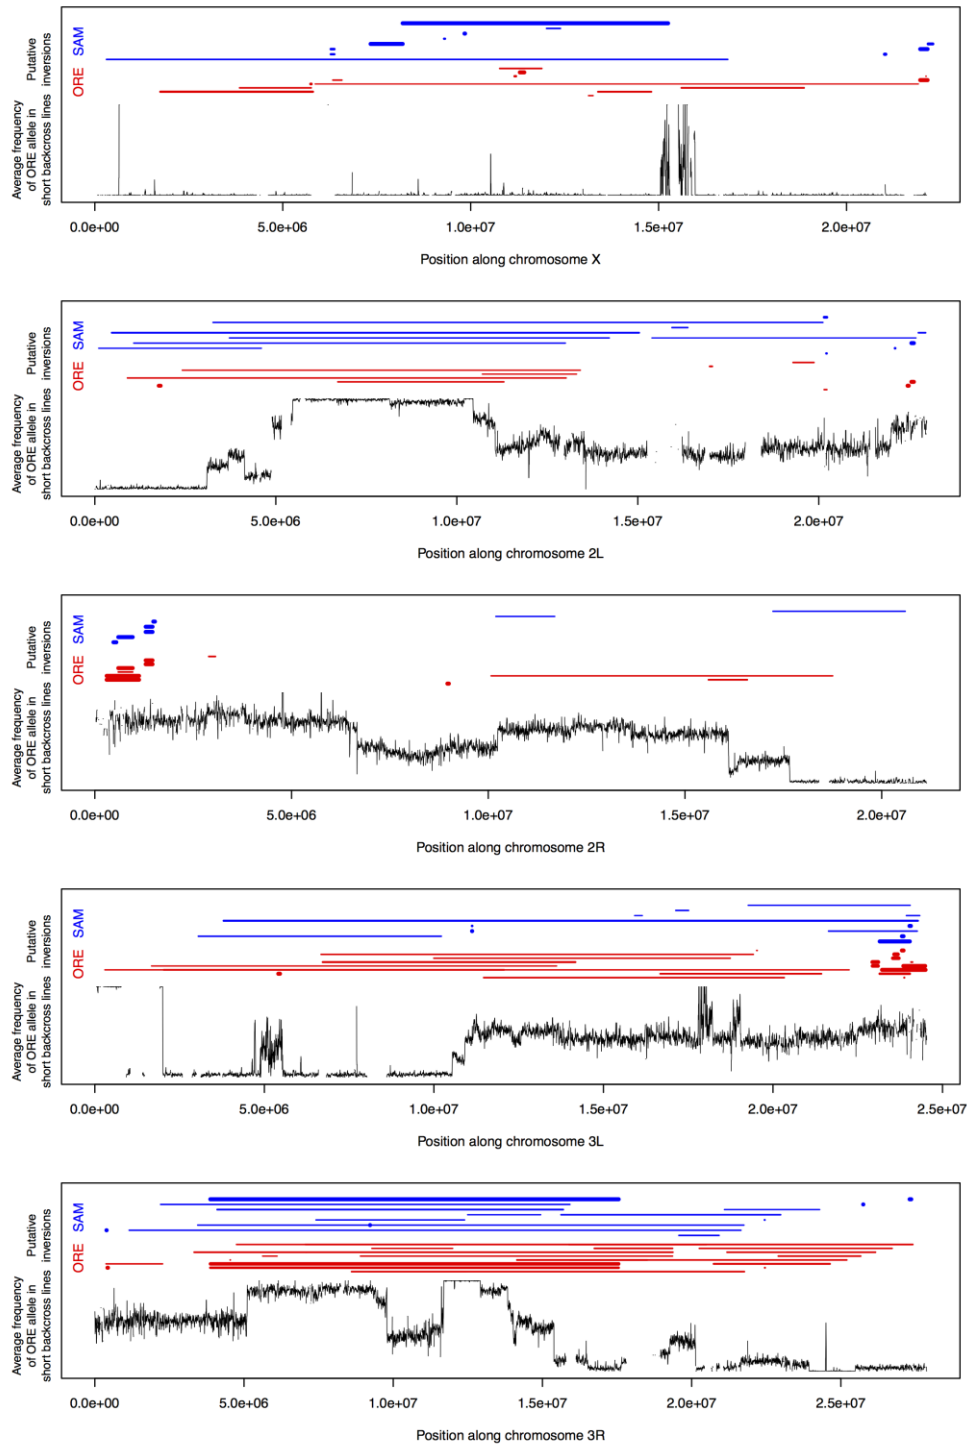

**Figure S7** Weak evidence for putative inversions based on paired-end reads mapping to discordant locations in the genome. Thicker bars indicate stronger evidence. Inversions are relative to the *D. melanogaster* reference genome. We searched for inversions using BreakDancer v1.1 (Chen et al. 2009).

## References

- Bailey TL, Bodén M, Buske FA, Frith M, Grant CE, Clementi L, Ren J, Li WW, Nole WS: **MEME SUITE: tools for motif discovery and searching.** *Nucleic Acids Res* 2009, **37**:W202-W208.
- Chen K, Wallis JW, McLellan MD, Larson DE, Kalicki JM, Pohl CS, McGrath SD, Wendl MC, Zhang Q, Locke DP, Shi X, Fulton RS, Ley TJ, Wilson RK, Ding L, Mardis ER: **BreakDancer: an algorithm for high-resolution mapping of genomic structural variation.** *Nat Methods* 2009, **6**:677-681.
- Guss KA, Nelson CE, Hudson A, Kraus ME, Carrol SB: **Control of a genetic regulatory network by a selector gene.** *Science* 2001, **292**: 1164-1167.
- Halder G, Carrol SB: **Binding of the Vestigial co-factor switches the DNA-target selectivity of the Scalloped selector protein.** *Development* 2001, **128**: 3295-3305.
