# Supplementary material
Source: PubMed Central journal article supplement (PMC3982700)
Supplement: c97607d8f70130395a65f38c10f3288a_genetics.113.159426-13.pdf [file c97607d8f70130395a65f38c10f3288a_genetics.113.159426-13.pdf]

**Table S5** Top 200 genes identified as being differentially expressed between wild-type and *sd<sup>E3</sup>* mutant flies by DGE analysis. (See SuppTable5.csv in Dryad package, doi:10.5061/dryad.1375s)
