# Supplementary material
Source: PubMed Central journal article supplement (PMC3982700)
Supplement: fbe6d5d35cbe9802e13c4c5d57f79608_genetics.113.159426-2.pdf [file fbe6d5d35cbe9802e13c4c5d57f79608_genetics.113.159426-2.pdf]

**Table S3 Detailed sequence pile-up (Li et al. 2009) for *scalloped* binding site regulating *cut* (Halder & Carrol 2001, Guss et al. 2001).**

| Chrom. | Pos.    | Ref. | # reads (SAM) | Read bases (SAM) | Base quality (SAM) | # reads (ORE) | Read bases (ORE) | Base quality (ORE)        |
|--------|---------|------|---------------|------------------|--------------------|---------------|------------------|---------------------------|
| X      | 7424817 | T    | 15            | ,.....           | HFIHIDIBI<GIII     | 15            | .\$.....         | DIIFIHIIHIII              |
| X      | 7424818 | G    | 15            | ,.....           | HIHGIEIGIGGIIIG    | 15            | ,.....^],        | GIIIIHGIIHIII             |
| X      | 7424819 | T    | 16            | ,\$.....^].      | EHGGICHGIGDIIHGE   | 15            | ,\$.....         | EIIIIIIIIII               |
| X      | 7424820 | C    | 15            | .....            | IIII4IBIBGIIIGI    | 16            | .....^],^],      | IGGIIIIIIIBIIEE           |
| X      | 7424821 | A    | 15            | .....G.          | IHIICIBIGGII*I     | 18            | .....^],^],      | IIIIIIIBIIIIIDBB          |
| X      | 7424822 | A    | 15            | .....            | FHHIEIGIDGIIGGI    | 18            | .....            | IIIIIIHIIIIHIII           |
| X      | 7424823 | T    | 15            | .....            | HIIDIGICGIIIGI     | 18            | .....            | IIIIIIHHI@IIIGII          |
| X      | 7424824 | G    | 15            | .....            | GIIIDI@IEGIGIGI    | 18            | .....            | IIIIIIIDIIIIHIIIG         |
| X      | 7424825 | T    | 15            | ,\$.....         | EGGG=HDCGIIIGI     | 18            | .....            | IIIIIIIIIGIIEHII          |
| X      | 7424826 | A    | 14            | .....            | IHIBIGIDGGIIGI     | 18            | .....            | IIIIIIIIIGIIII            |
| X      | 7424827 | A    | 14            | .....            | HII:I4IDGIIIGI     | 19            | .....^],         | IIIIIIIIIIHIG>            |
| X      | 7424828 | T    | 14            | .....            | III=IEIEGIIII      | 22            | .....^],^],^],   | IHHIIIIIIIIHIEBBB         |
| X      | 7424829 | T    | 14            | .....            | III?IBICDIIII      | 23            | .....^],         | IIHIIIFIIHIIIFIHICEEED    |
| X      | 7424830 | C    | 14            | .....            | IIH?IDIDDIIII      | 23            | .....            | IIIIIIIIHIGIIHBFHF        |
| X      | 7424831 | G    | 14            | ,\$.....         | EDIDIGICGIIII      | 24            | .....^],         | IIIIIIHIIIIIGBIHIE        |
| X      | 7424832 | A    | 14            | .....^].         | >>DFGI>EIIII7      | 25            | .....^].         | IIHIIIIIGIIIIHGHIGI>      |
| X      | 7424833 | A    | 14            | ,\$.....         | ;<IGIGHIIII:       | 25            | .....            | IIIIIIIIHIIIIIDI>II?      |
| X      | 7424834 | A    | 13            | ,\$.....         | 9?IBIGHIIII5       | 25            | .....            | IIIIIIIIIIIEIH>IIHIIA     |
| X      | 7424835 | A    | 12            | .....            | BIGIDHIIII5        | 25            | .....            | IIIIIIIIIIIIIGIHHIB       |
| X      | 7424836 | A    | 12            | .....            | DIGIDHIIII2        | 25            | .....            | IIIGIIIIIIHIIIEIIGIHHIE   |
| X      | 7424837 | T    | 12            | .....            | @IBGBEFBIII-       | 26            | .....^].         | IIIIIIIIII8IHHHI@ADHDEDIE |
| X      | 7424838 | G    | 12            | .....            | GIGHDDIIII:        | 26            | .....            | HIIIIIIIIIIIIIGHHIIII     |
| X      | 7424839 | T    | 12            | .....            | GH@IGGHIFHI4       | 26            | .....            | HIIIIIIHIIIGIIII3IHHIHI   |
| X      | 7424840 | C    | 12            | .....            | GIGI<GIIII5        | 26            | .....            | IIIIIIIIIIHIG8IHDHII      |
| X      | 7424841 | G    | 13            | .....^].         | :IGIGGIIGII7E      | 26            | .....            | IIIIIIIIIIIIIGIHHII       |
